# Supplementary material for: From vineyards to reshapable materials: α-CF2 activation in 100% resveratrol-based catalyst-free vitrimers
Source: Royal Society of Chemistry journal article supplement (doi:10.1039/d3py00017f), 2023-01-01
Supplement: d3py00017f1.pdf [file d3py00017f1.pdf]

## Supplementary information to “From vineyards to reshapable materials: $\alpha$ -CF<sub>2</sub> activation in 100 % resveratrol-based catalyst-free vitrimers”

Florian Cuminet,<sup>\*a,b</sup> Sébastien Lemouzy,<sup>a</sup> Éric Dantras,<sup>b</sup> Éric Leclerc,<sup>a</sup> Vincent Ladmiral and Sylvain Caillol<sup>\*a</sup>

a. ICGM, Univ Montpellier, CNRS, ENSCM, Montpellier, France

b. CIRIMAT, Université Toulouse 3 Paul Sabatier, Physique des Polymères, 118 Route de Narbonne, 31062 Toulouse, France

### Table of contents

|                                                                                                                                                   |    |
|---------------------------------------------------------------------------------------------------------------------------------------------------|----|
| Resveratrol $\alpha,\alpha$ -difluorotriester “RvOEt” characterizations.....                                                                      | 2  |
| Figure S1. <sup>1</sup> H NMR spectrum of RvOEt in CDCl <sub>3</sub> .....                                                                        | 2  |
| Figure S2. <sup>19</sup> F NMR spectrum of RvOEt in CDCl <sub>3</sub> .....                                                                       | 2  |
| Resveratrol $\alpha,\alpha$ -difluorotriacid “RvOH-TAF” characterizations.....                                                                    | 3  |
| Figure S3. <sup>13</sup> C NMR spectrum of RvOEt in CDCl <sub>3</sub> .....                                                                       | 3  |
| Figure S4. <sup>1</sup> H NMR spectrum of RvOH-TAF in DMSO-d <sub>6</sub> .....                                                                   | 3  |
| Figure S5. <sup>19</sup> F NMR spectrum of RvOH-TAF in DMSO-d <sub>6</sub> .....                                                                  | 4  |
| Figure S6. <sup>13</sup> C NMR spectrum of RvOH-TAF in DMSO-d <sub>6</sub> .....                                                                  | 4  |
| Figure S7. <sup>1</sup> H NMR spectrum of RvOGly in acetone-d <sub>6</sub> .....                                                                  | 5  |
| Figure S8. <sup>13</sup> C NMR spectrum of RvOGly in acetone-d <sub>6</sub> .....                                                                 | 5  |
| A. Experimental procedure for the determination of RvOGly epoxy equivalent weight (EEW) by <sup>1</sup> H NMR.....                                | 6  |
| Vitrimer characterizations (Vm-RvOH).....                                                                                                         | 7  |
| Figure S9. DSC thermogram of Vm-RvOH after curing 3 h at room temperature.....                                                                    | 7  |
| Figure S10. DSC thermogram of Vm-RvOH after curing 3 h at room temperature and 1 h at 150 °C.....                                                 | 8  |
| Figure S11. Curing step at 150 °C monitored by the evolution of the material storage modulus G'.....                                              | 9  |
| Figure S12. DSC thermogram of Vm-RvOH after complete curing 10 h at 150 °C.....                                                                   | 9  |
| Figure S13. DMA thermogram of Vm-RvOH after complete curing 10 h at 150 °C (0.1 % strain, 1 Hz, 3 °C/min).....                                    | 10 |
| Figure S14. TGA thermogram under nitrogen of Vm-RvOH after complete curing 10 h at 150 °C.....                                                    | 10 |
| Figure S15. Isothermal TGA thermogram at 170 °C under air of Vm-RvOH after complete curing 10 h at 150 °C.....                                    | 11 |
| Figure S16. Stress–relaxation curves of Vm-RvOH from 170 to 210 °C with 10 °C steps (0.3 % strain).....                                           | 11 |
| Table S1. Equation and fitting parameters of the Kohlrausch-Williams-Watts stretched exponential model for the stress relaxation experiments..... | 12 |
| Figure S17. TGA thermogram under nitrogen of Vm-RvOH after complete curing 10 h at 150 °C recorded at 5 °C/min.....                               | 12 |

# Resveratrol $\alpha,\alpha$ -difluorotriester "RvOEt" characterizations

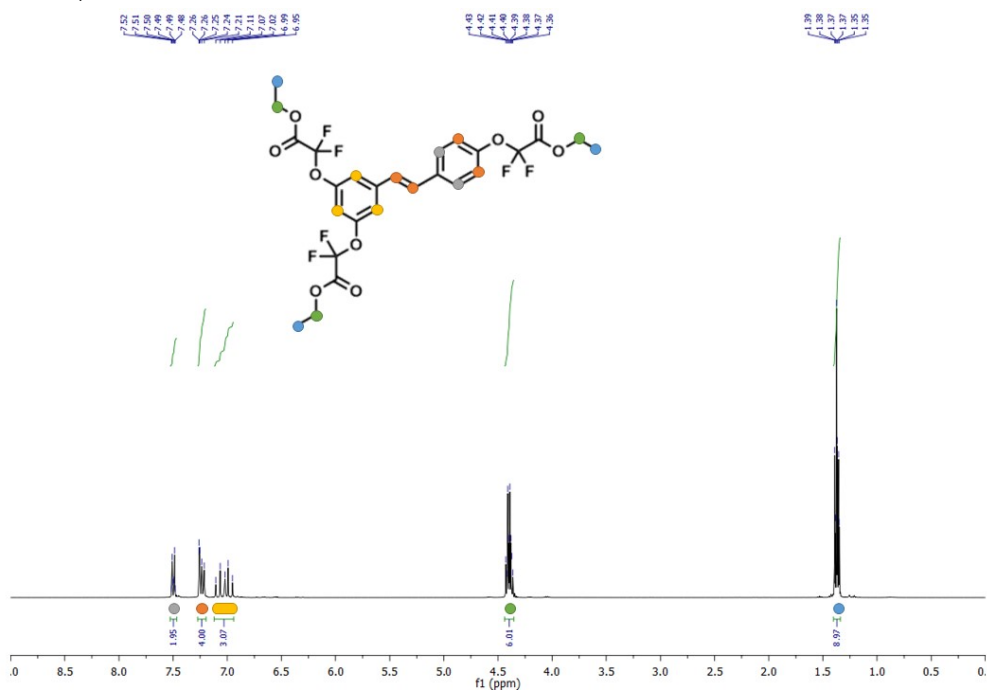

Figure S1.  $^1\text{H NMR}$  spectrum of RvOEt in  $\text{CDCl}_3$

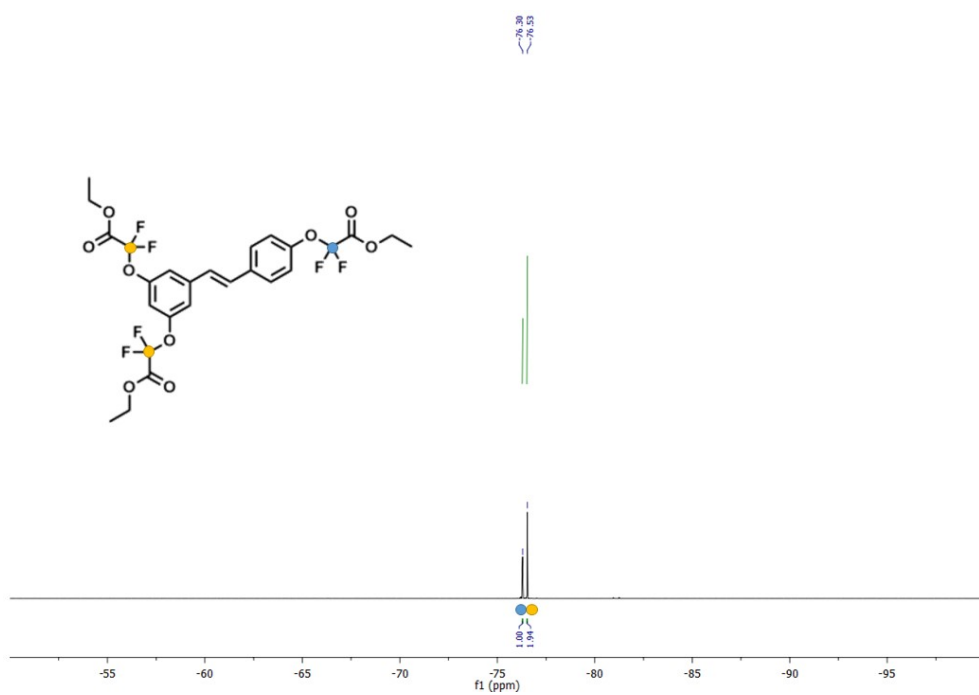

Figure S2.  $^{19}\text{F NMR}$  spectrum of RvOEt in  $\text{CDCl}_3$

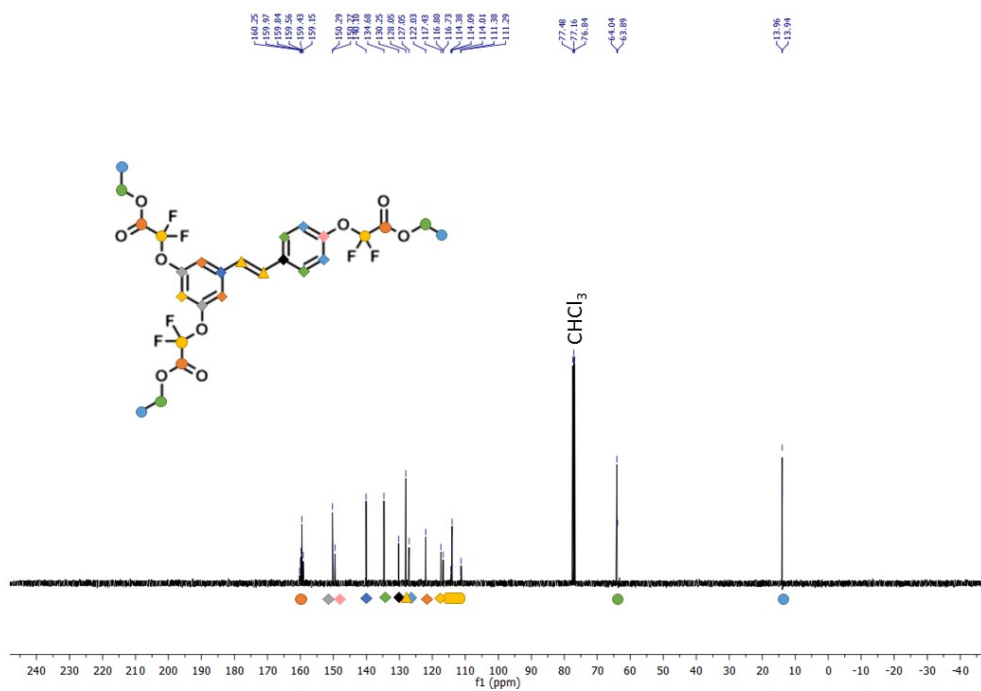

Figure S3.  $^{13}\text{C}$  NMR spectrum of RvOEt in  $\text{CDCl}_3$

### Resveratrol $\alpha,\alpha$ -difluorotriacid "RvOH-TAF" characterizations

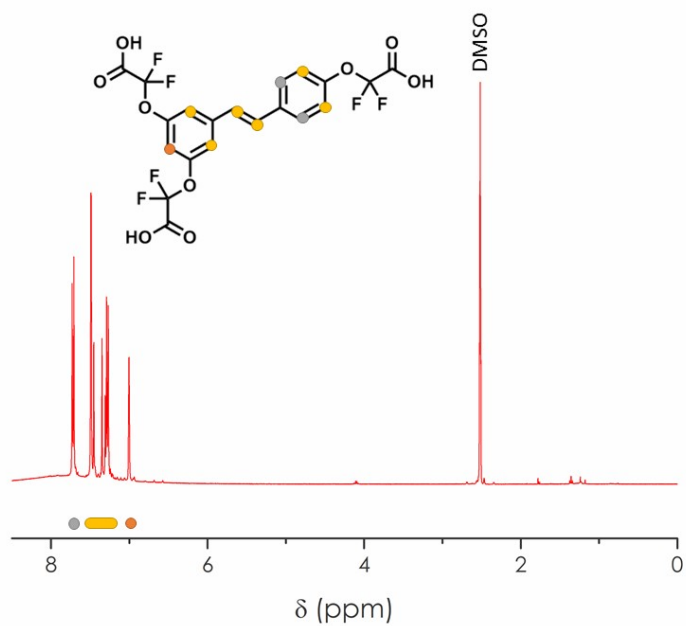

Figure S4.  $^1\text{H}$  NMR spectrum of RvOH-TAF in  $\text{DMSO}-d_6$

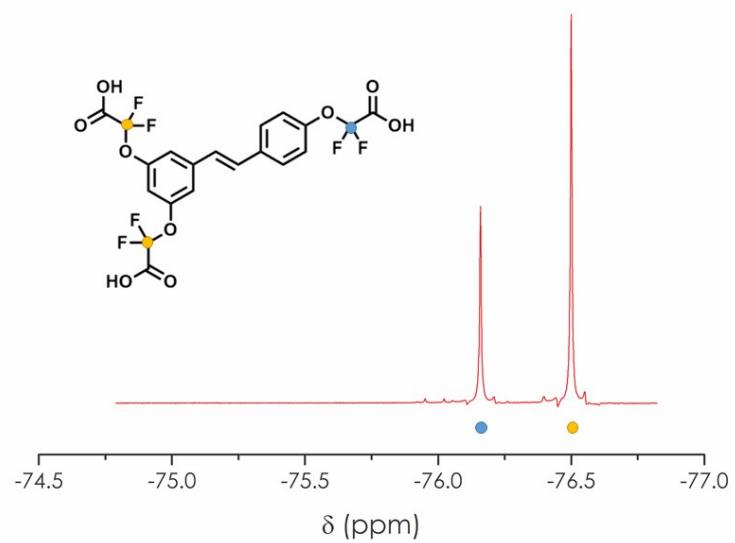

Figure S5.  $^{19}\text{F}$  NMR spectrum of RvOH-TAF in  $\text{DMSO-d}_6$

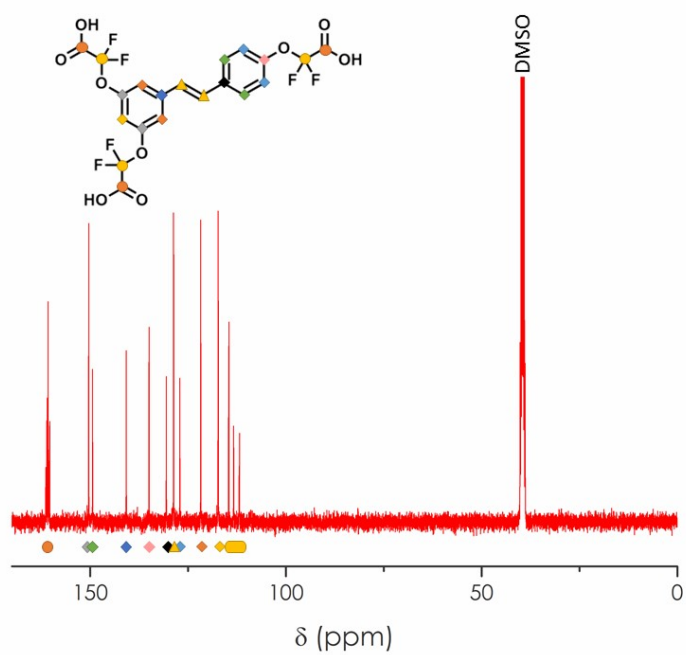

Figure S6.  $^{13}\text{C}$  NMR spectrum of RvOH-TAF in  $\text{DMSO-d}_6$

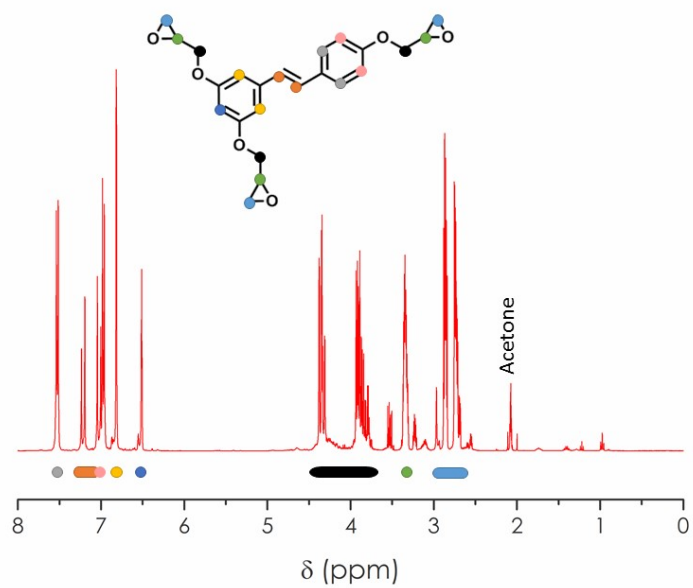

Figure S7.  $^1\text{H}$  NMR spectrum of RvOGly in  $\text{acetone-}d_6$

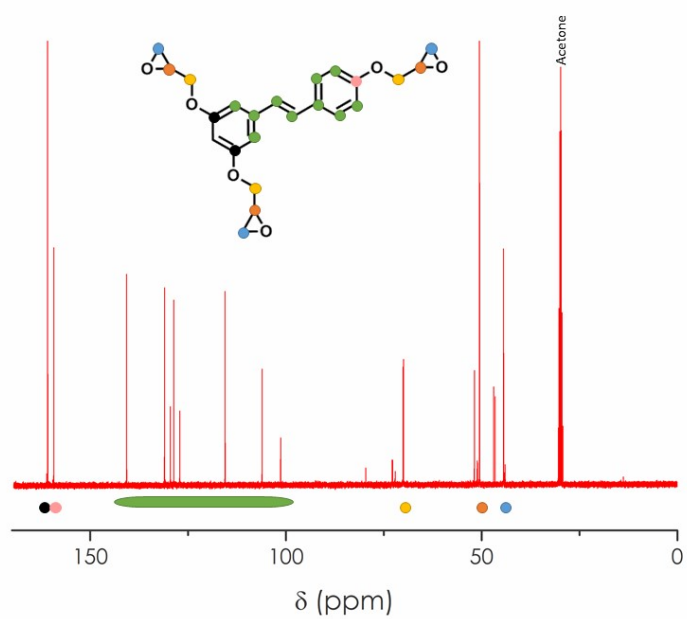

Figure S8.  $^{13}\text{C}$  NMR spectrum of RvOGly in  $\text{acetone-}d_6$

A. Experimental procedure for the determination of RvOGly epoxy equivalent weight (EEW) by  $^1\text{H}$  NMR

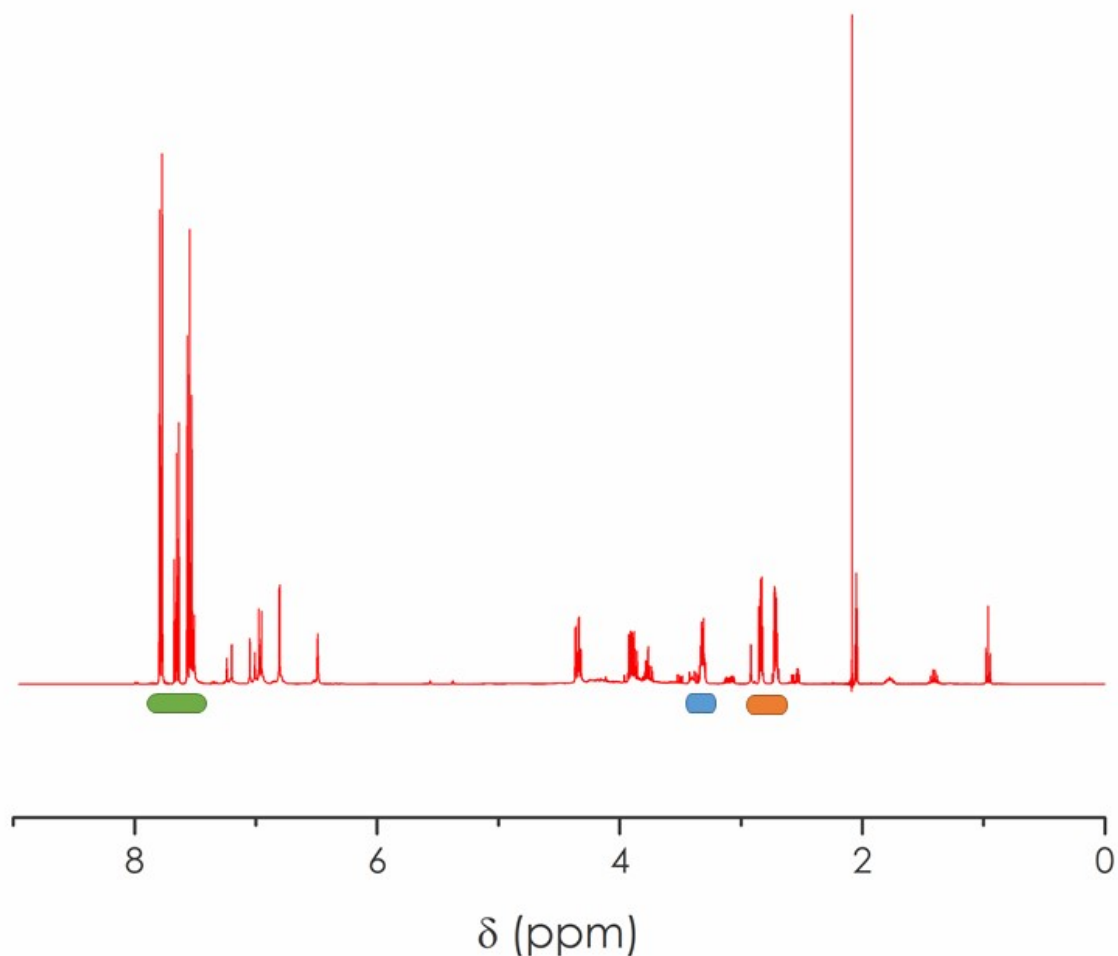

50 to 70 mg of BDGE and 50 to 130 mg of RvOGly were dissolved in deuterated acetone.  $^1\text{H}$  NMR spectra were integrated in the 7.87-7.28 ppm range for benzophenone protons (10 H), in the 3.46-3.26 ppm range for CH oxirane and in the 3.0-2.65 range for  $\text{CH}_2$  oxirane. EEW was calculated as follows :

$$EEW_{CH} = \frac{m_{BDGE} \times \int_{7.28}^{7.87} \text{benzophenone} \times M_{\text{benzophenone}}}{10 \times m_{\text{benzophenone}} \times \int_{3.26}^{3.46} \text{CH oxirane}}$$

$$EEW_{CH_2} = \frac{2 \times m_{BDGE} \times \int_{7.28}^{7.87} \text{benzophenone} \times M_{\text{benzophenone}}}{10 \times m_{\text{benzophenone}} \times \int_{2.65}^{3.0} \text{CH}_2 \text{ oxirane}}$$

| $m_{\text{epoxy}}$<br>(mg) | $m_{\text{benzophenone}}$ (mg) | $\frac{\int_{2.97}^{3.19} CH \text{ oxirane}}{\int_{7.28}^{7.87} \text{benzophenone}}$ | $\frac{\int_{2.45}^{2.82} CH_2 \text{ oxirane}}{\int_{7.28}^{7.87} \text{benzophenone}}$ | $EEW_{CH}$          | $EEW_{CH_2}$ |
|----------------------------|--------------------------------|----------------------------------------------------------------------------------------|------------------------------------------------------------------------------------------|---------------------|--------------|
| 55.9                       | 39.9                           | 0.157                                                                                  | 0.283                                                                                    | 163                 | 180          |
| 94.8                       | 44.8                           | 0.227                                                                                  | 0.390                                                                                    | 170                 | 198          |
| 125.9                      | 54.8                           | 0.245                                                                                  | 0.402                                                                                    | 171                 | 208          |
| <b>Average EEW</b>         |                                |                                                                                        |                                                                                          | <b>182 ± 8 g/eq</b> |              |

Vitrimer characterizations (Vm-RvOH)

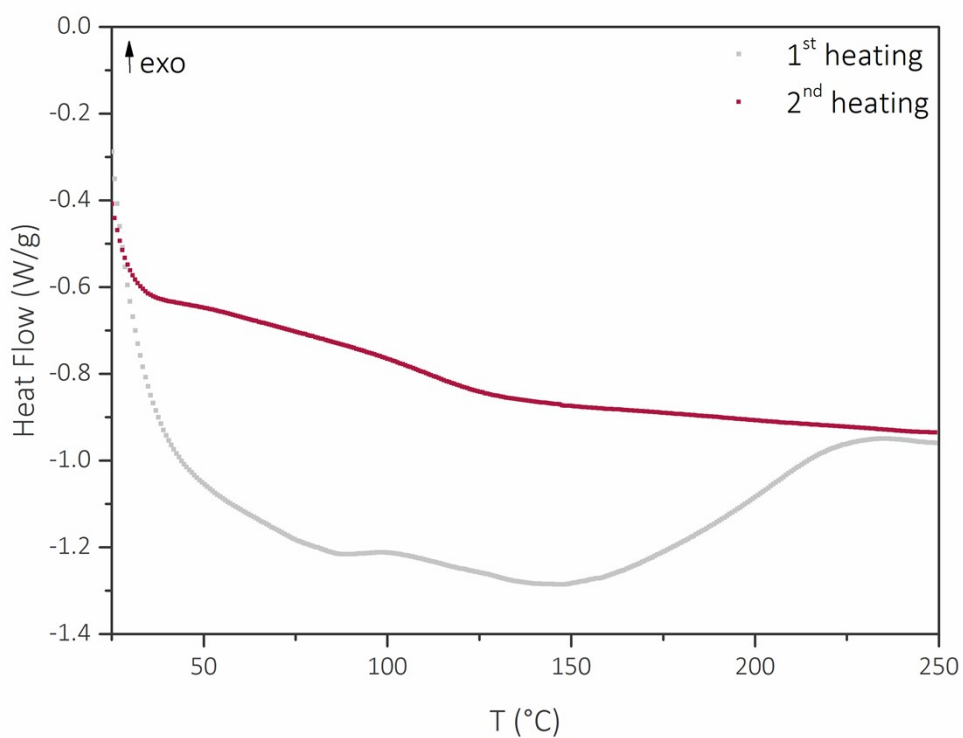

Figure S9. DSC thermogram of Vm-RvOH after curing 3 h at room temperature

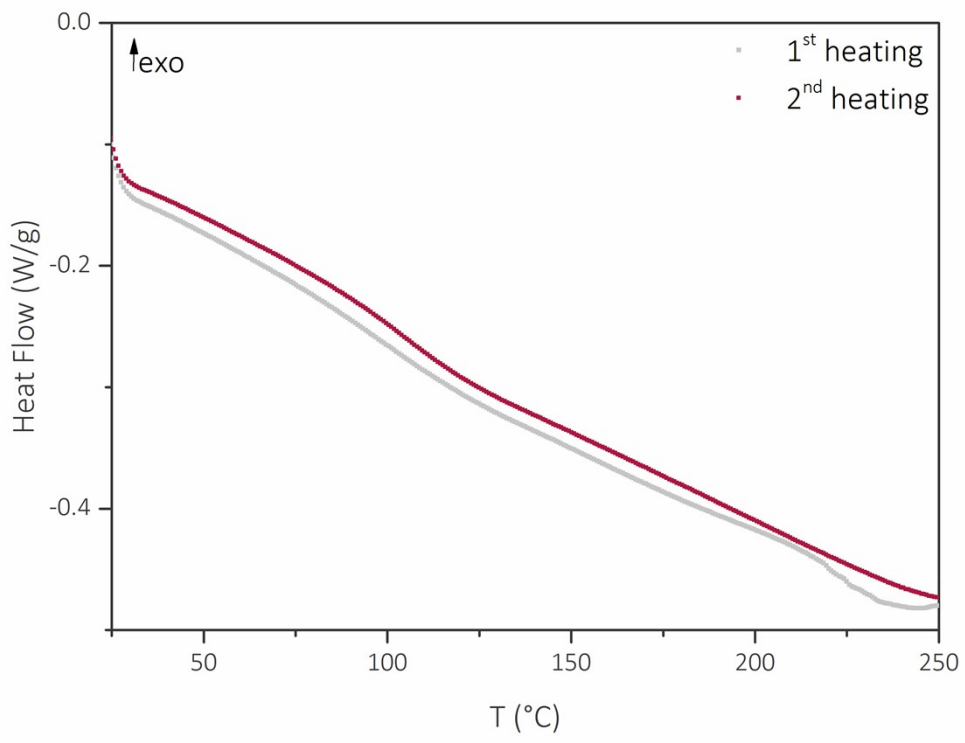

Figure S10. DSC thermogram of Vm-RvOH after curing 3 h at room temperature and 1 h at 150 °C



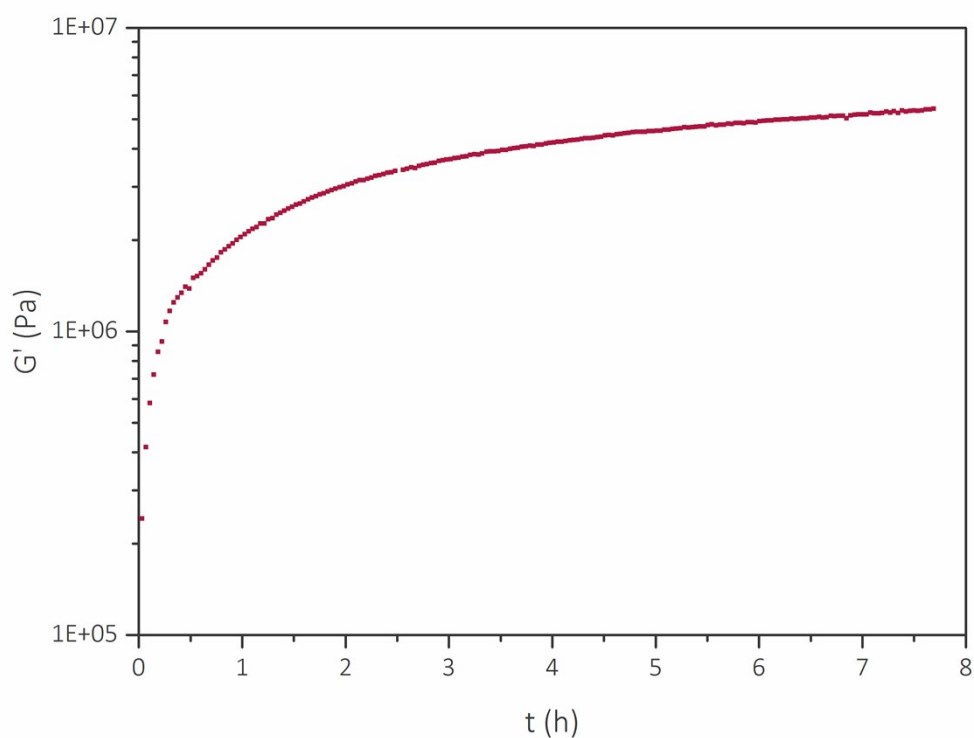

Figure S11. Curing step at 150 °C monitored by the evolution of the material storage modulus  $G'$

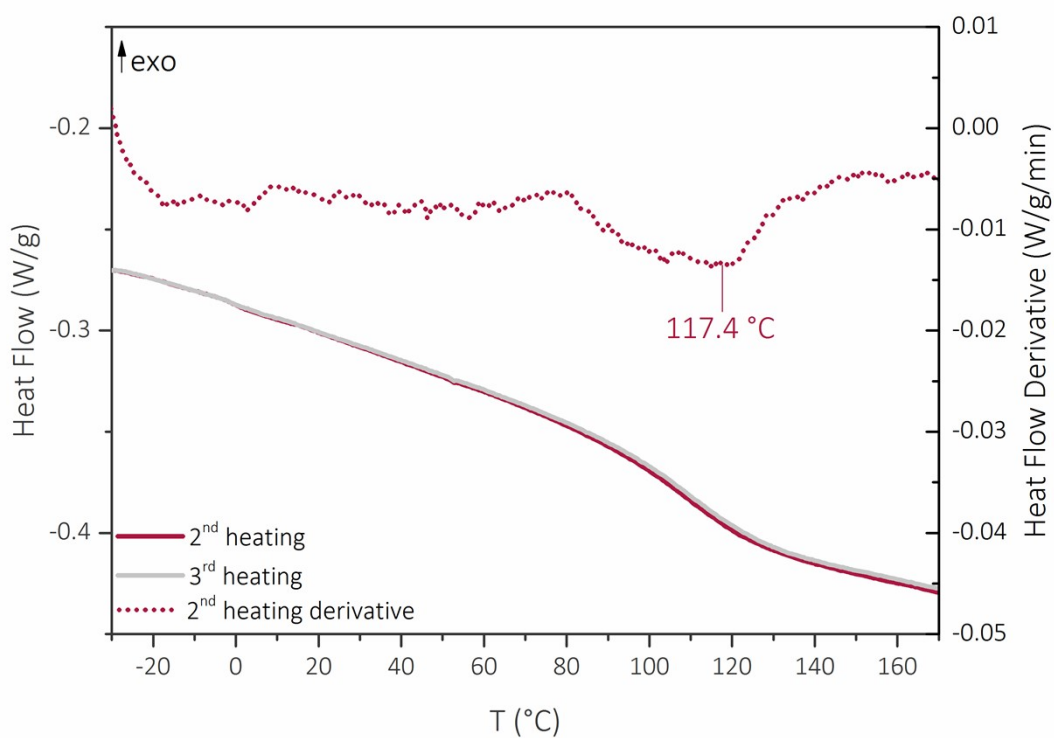

Figure S12. DSC thermogram of Vm-RvOH after complete curing 10 h at 150 °C.

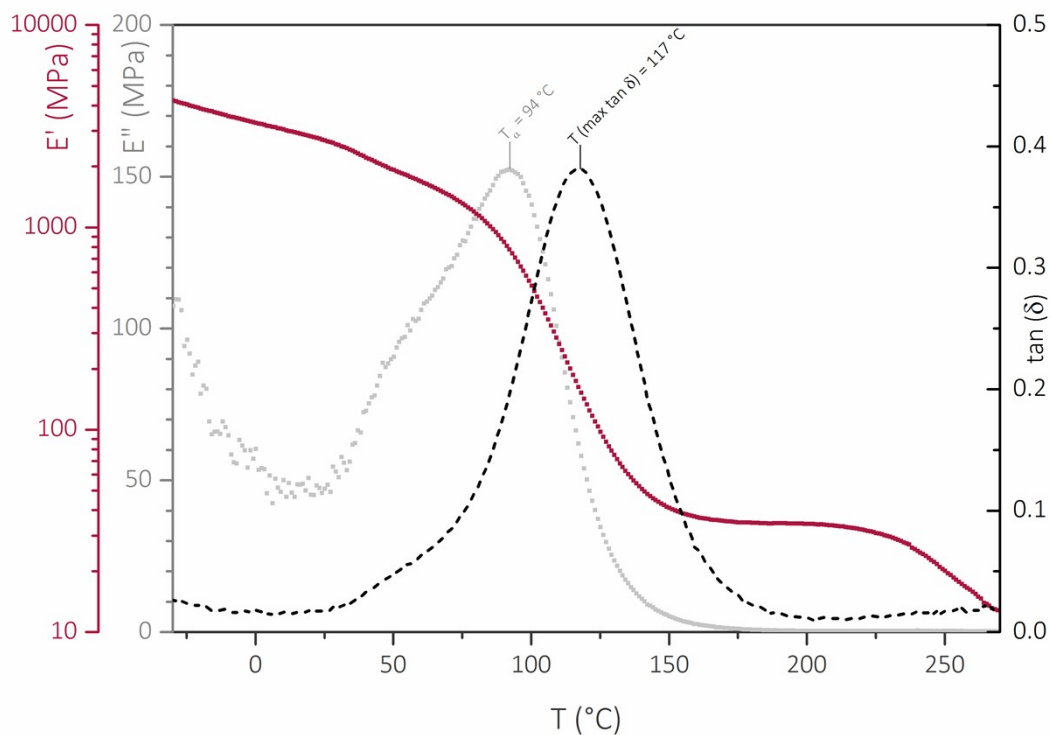

Figure S13. DMA thermogram of Vm-RvOH after complete curing 10 h at 150  $^{\circ}\text{C}$  (0.1 % strain, 1 Hz, 3  $^{\circ}\text{C}/\text{min}$ )

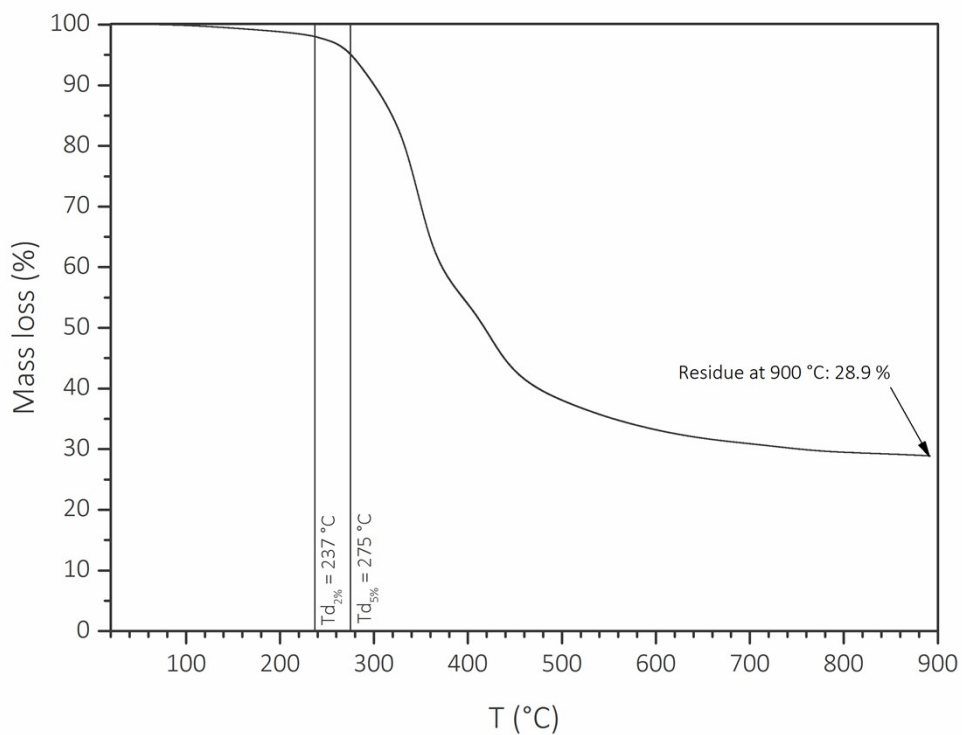

Figure S14. TGA thermogram under nitrogen of Vm-RvOH after complete curing 10 h at 150  $^{\circ}\text{C}$

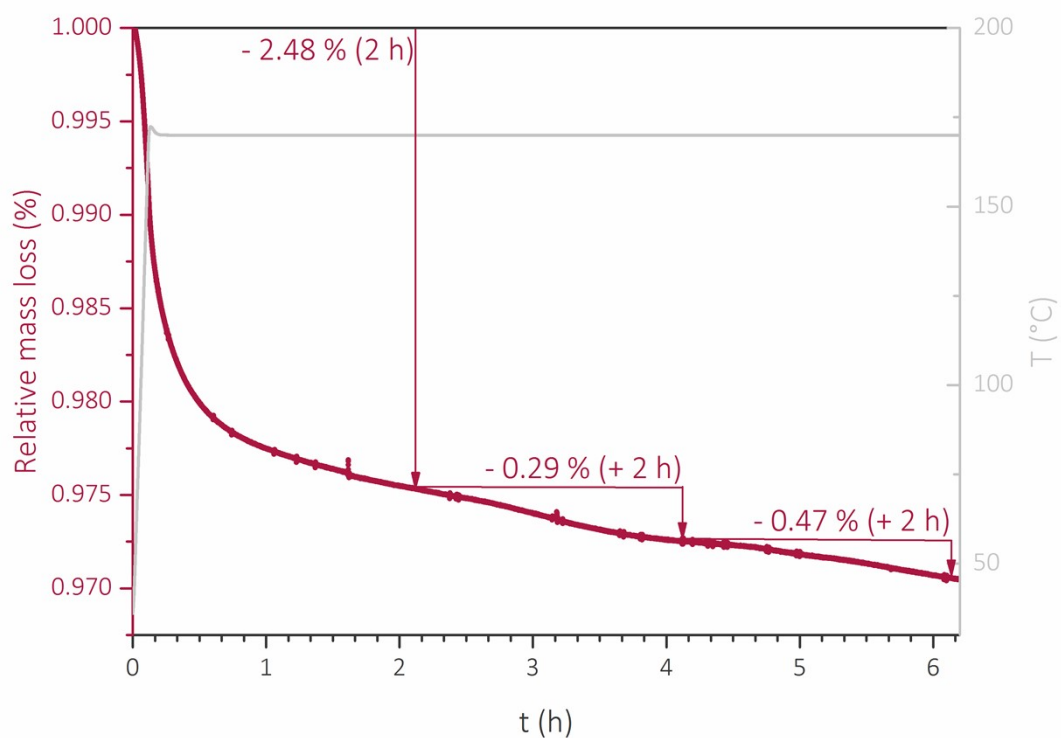

Figure S15. Isothermal TGA thermogram at 170 °C under air of Vm-RvOH after complete curing 10 h at 150 °C

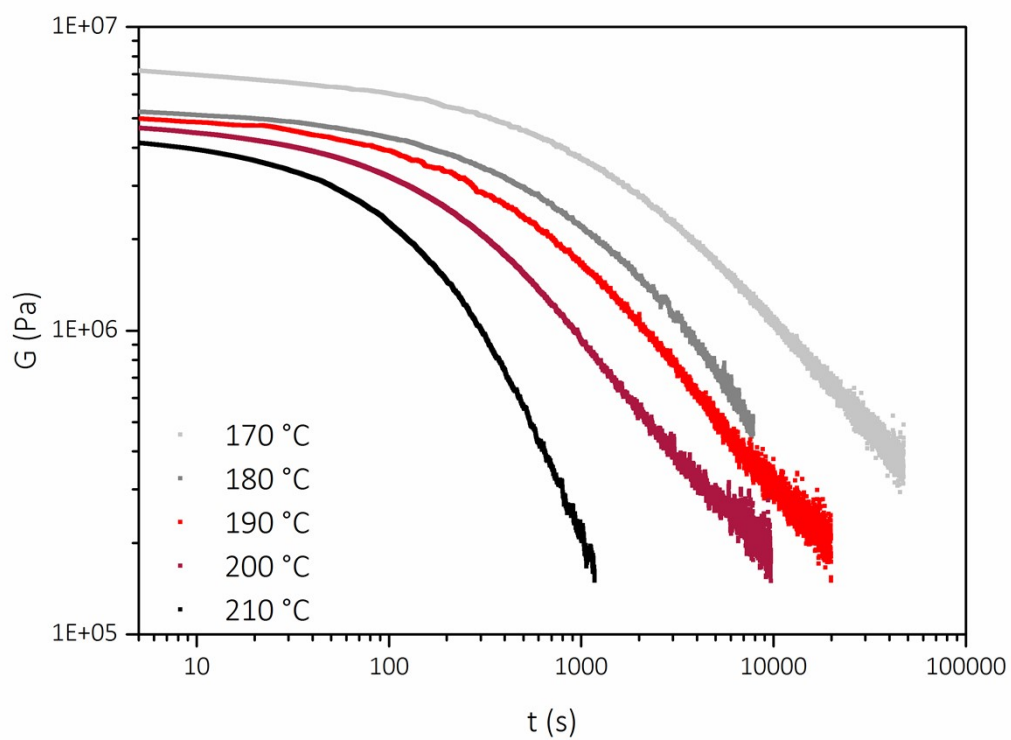

Figure S16. Stress-relaxation curves of Vm-RvOH from 170 to 210 °C with 10 °C steps (0.3 % strain)

Table S1. Equation and fitting parameters of the Kohlrausch-Williams-Watts stretched exponential for the stress relaxation experiments

|                                                             |            |         |         |         |         |         |
|-------------------------------------------------------------|------------|---------|---------|---------|---------|---------|
| $\frac{G}{G_0} = e\left(\frac{-t}{\tau}\right)^\beta + y_0$ | T (°C)     | 170     | 180     | 190     | 200     | 210     |
|                                                             | $\tau$ (s) | 1827    | 1042    | 648     | 333     | 156     |
|                                                             | $\beta$    | 0.486   | 0.569   | 0.593   | 0.642   | 0.797   |
|                                                             | $y_0$      | 0.043   | 0.049   | 0.060   | 0.064   | 0.053   |
|                                                             | $R^2$      | 0.99962 | 0.99975 | 0.99937 | 0.99974 | 0.99979 |

Note: for  $\beta = 1$  and  $y_0 = 0$ , the KWW expression becomes a Maxwell

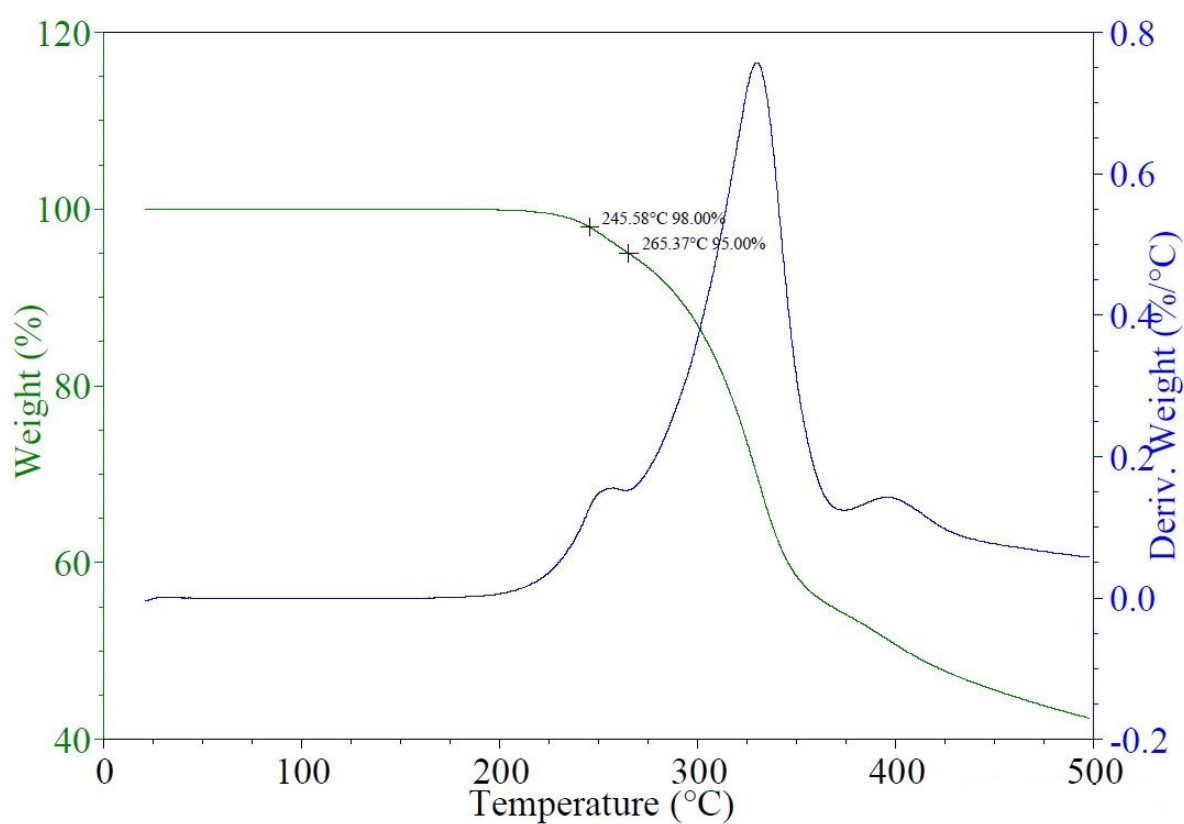

Figure S17. TGA thermogram under nitrogen of Vm-RvOH after complete curing 10 h at 150 °C recorded at 5 °C/min
